# Supplementary material for: Interplay between crystallization and the Diels–Alder reaction in biobased multiblock copolyesters possessing dynamic covalent bonds
Source: Royal Society of Chemistry journal article supplement (doi:10.1039/c7py00677b), 2017-01-01
Supplement: c7py00677b1.pdf [file c7py00677b1.pdf]

**Supporting information for**

**Interplay between crystallization and Diels-Alder reaction in  
biobased multiblock copolyesters possessing dynamic covalent bond**

Yang Zhang, Zehui Dai, Jiarui Han, Ting Li, Jun Xu, Baohua Guo\*

Key Laboratory of Advanced Materials of Ministry of Education, Department of  
Chemical Engineering, Tsinghua University, Beijing 100084, China

\* Corresponding Author: E-mail: [bhguo@mail.tsinghua.edu.cn](mailto:bhguo@mail.tsinghua.edu.cn)

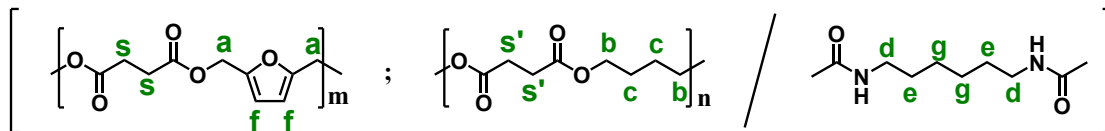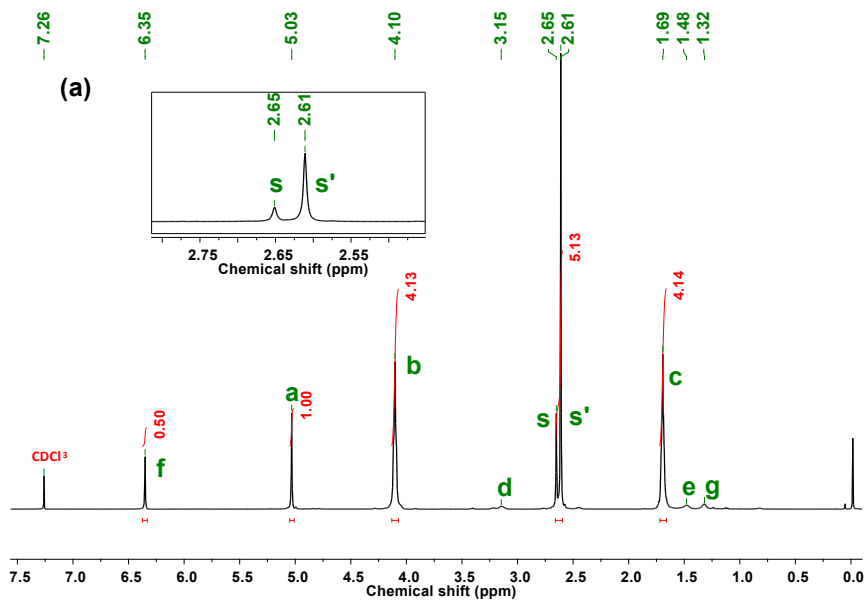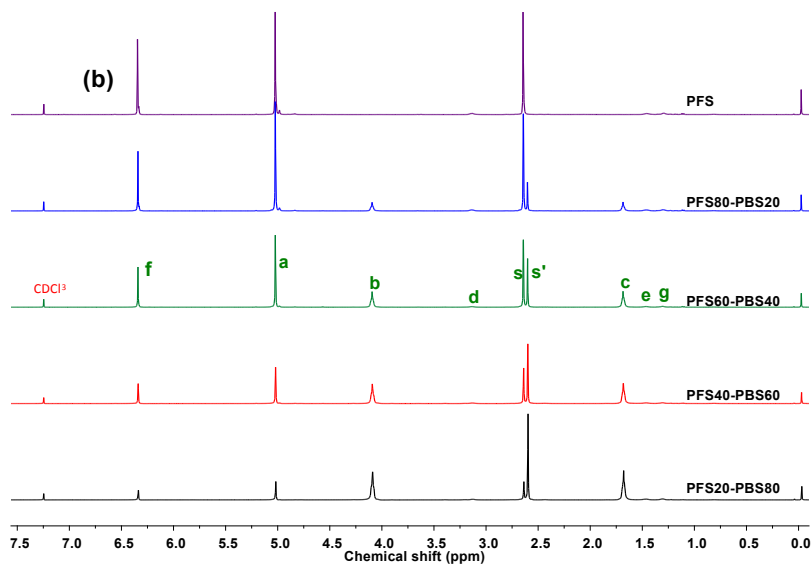

**Fig. S1** The  $^1\text{H}$  NMR spectra of (a) representative PFS20-PBS80 and (b) PFS-PBS multiblock copolyesters.

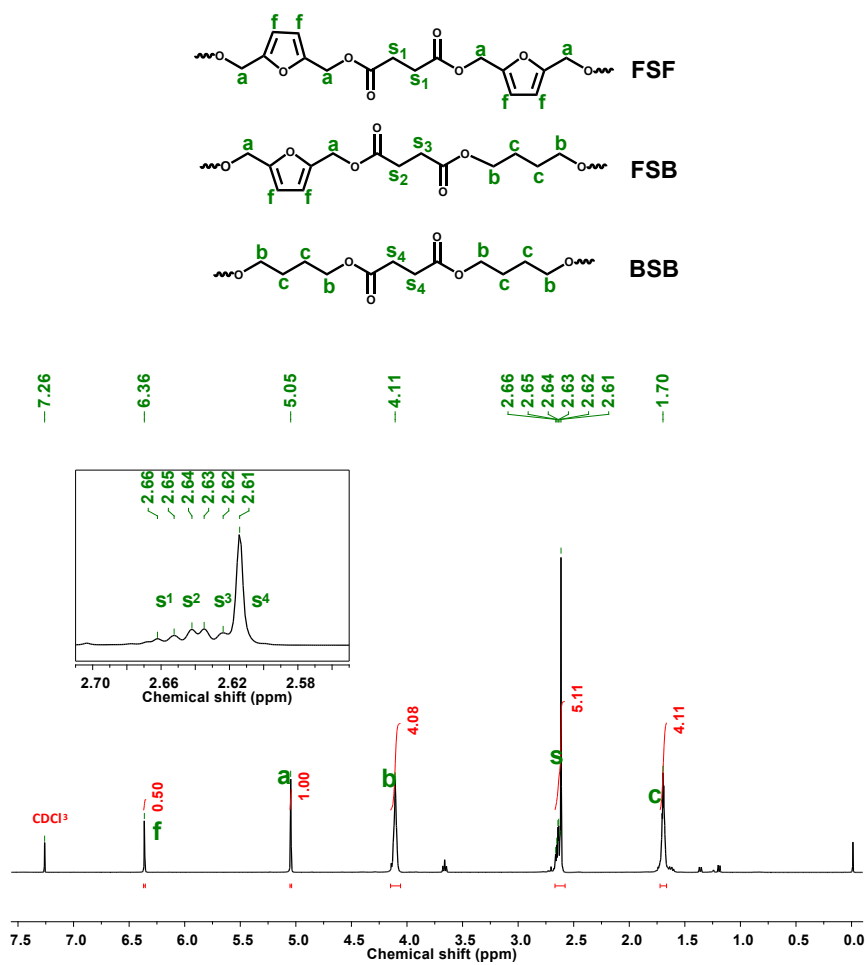

**Fig. S2** The <sup>1</sup>H NMR spectrum of PFBS20 random copolyester.

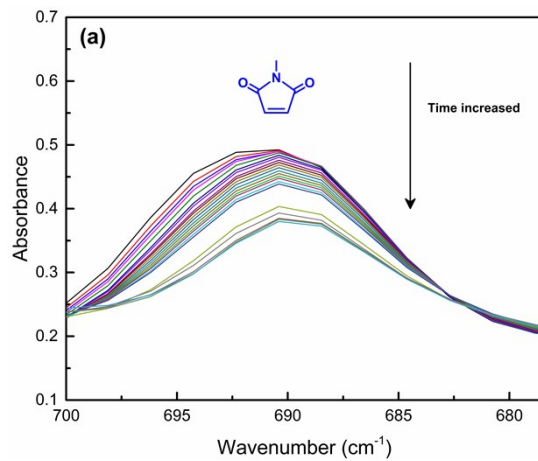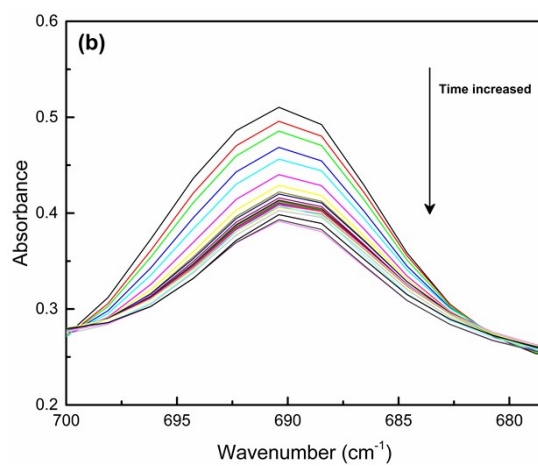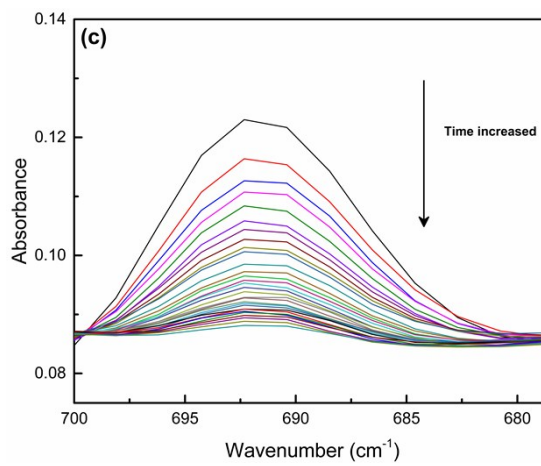

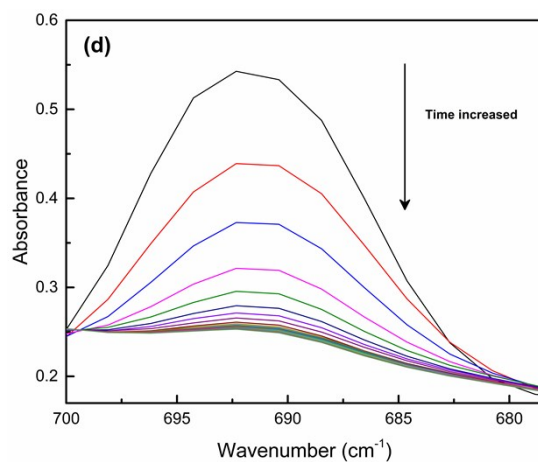

**Fig. S3.** *In situ* FTIR spectra of PFS/BMI-4:1 in imide peak region during DA reaction at (a) 25 °C, (b) 40 °C, (c) 75 °C and (c) 90 °C.

**Table S1** The molecular weights of PFS-PBS copolyesters

| Sample      | $M_n \times 10^{-4}(\text{g/mol})$ | $M_w \times 10^{-4}(\text{g/mol})$ | PDI  |
|-------------|------------------------------------|------------------------------------|------|
| PFS20-PBS80 | 5.53                               | 12.35                              | 2.23 |
| PFS40-PBS60 | 4.16                               | 7.54                               | 1.81 |
| PFS60-PBS40 | 4.94                               | 14.02                              | 2.83 |
| PFS80-PBS20 | 4.36                               | 7.30                               | 1.68 |
| PFS         | 4.82                               | 9.43                               | 1.95 |
